# Supplementary material for: Optimizing Bioink Composition for Human Chondrocyte Expression of Lubricin
Source: MDPI journal article supplement (doi:10.3390/bioengineering10090997), 2023-08-23

Figure S1: DoE design parameters

Optimal Combined design, model: quadratic by quadratic, point exchanges

Mixture components: GelMA, OMA, PBS

Numeric: crosslinking time 15-60s

Categoric: Ca

60 runs

Design Constraints

| Low Limit |   | Constraint   |          | High Limit     |
|-----------|---|--------------|----------|----------------|
| 0.000     | ≤ | A:GelMa      | ≤        | 12.000         |
| 86.000    | ≤ | B:PBS        | ≤        | 98.000         |
| 0.000     | ≤ | C:OMA        | ≤        | 2.000          |
| 2.000     | ≤ | A + C        | ≤        | 14.000         |
|           |   | <b>A+B+C</b> | <b>=</b> | <b>100.000</b> |

Figure S2: Lap/shear setup

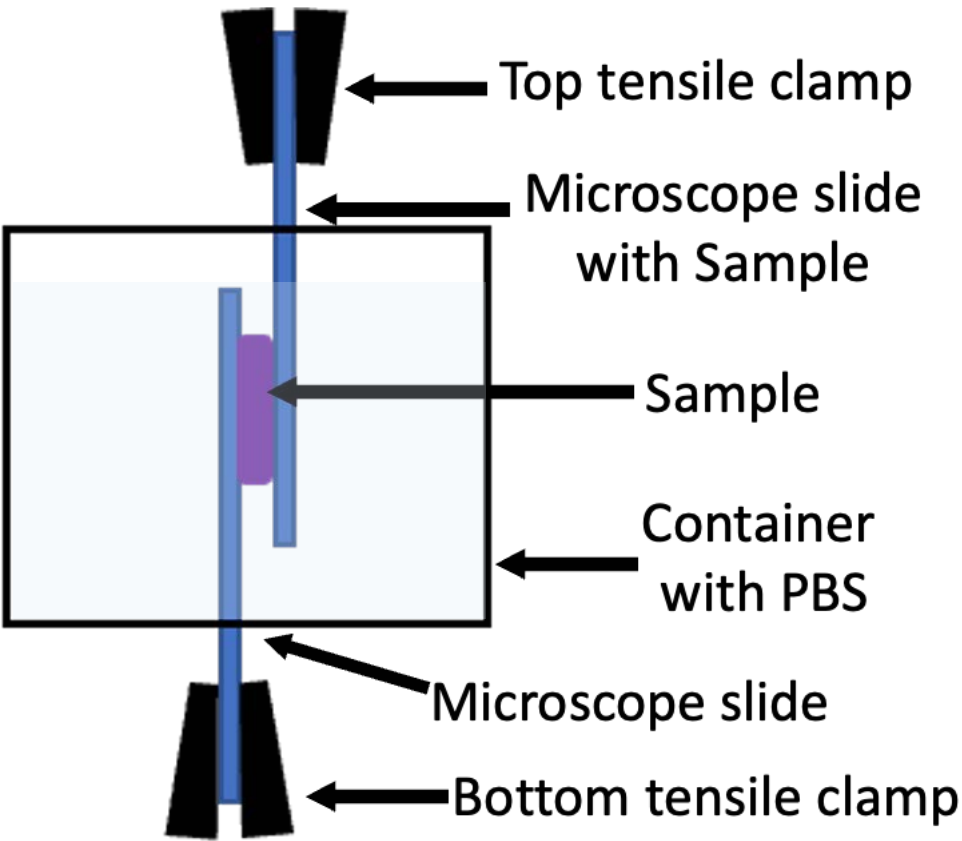

Figure S3: DoE temporal ANOVA results

| Day 3            |         |          |         |          |
|------------------|---------|----------|---------|----------|
| Source           | Term df | Error df | F-value | p-value  |
| Subplot          | 10      | 41.27    | 5.73    | < 0.0001 |
| Linear Mixture   | 2       | 46.37    | 7.42    | 0.0016   |
| AB               | 1       | 45.46    | 4.89    | 0.0321   |
| AC               | 1       | 47.54    | 12.24   | 0.001    |
| BC               | 1       | 47.45    | 11.64   | 0.0013   |
| Bd               | 1       | 28.64    | 4.07    | 0.0532   |
| Be               | 1       | 26.32    | 11.77   | 0.002    |
| Ad <sup>2</sup>  | 1       | 45.75    | 4.41    | 0.0414   |
| Cd <sup>2</sup>  | 1       | 48.59    | 4.6     | 0.037    |
| ACd <sup>2</sup> | 1       | 46.69    | 13.28   | 0.0007   |
| Day 8            |         |          |         |          |
| Subplot          | 5       | 46.81    | 7.36    | < 0.0001 |
| Linear Mixture   | 2       | 44.17    | 3.18    | 0.0512   |
| AB               | 1       | 54       | 3.59    | 0.0636   |
| BC               | 1       | 42.29    | 21.1    | < 0.0001 |
| Cd               | 1       | 23.46    | 5.54    | 0.0274   |
| Day 10           |         |          |         |          |
| Subplot          | 13      | 33.83    | 4.24    | 0.0004   |
| Linear Mixture   | 2       | 37.03    | 11.94   | < 0.0001 |
| AB               | 1       | 46       | 6.64    | 0.0132   |
| AC               | 1       | 37.56    | 23.49   | < 0.0001 |
| Ad               | 1       | 39.26    | 0.0521  | 0.8207   |
| Ae               | 1       | 42.95    | 0.0518  | 0.8211   |
| Cd               | 1       | 43.8     | 0.2483  | 0.6208   |
| Ce               | 1       | 45.65    | 0.1981  | 0.6584   |
| ACd              | 1       | 45.79    | 0.2899  | 0.5929   |
| ACe              | 1       | 44.55    | 0.029   | 0.8656   |
| Ade              | 1       | 39.16    | 0.0211  | 0.8852   |
| Cde              | 1       | 43.86    | 0.2424  | 0.625    |
| ACde             | 1       | 45.86    | 1.03    | 0.3155   |

| Day 14         |         |          |         |          |
|----------------|---------|----------|---------|----------|
| Source         | Term df | Error df | F-value | p-value  |
| Subplot        | 5       | 43.96    | 8       | < 0.0001 |
| Linear Mixture | 2       | 40.91    | 12      | < 0.0001 |
| AB             | 1       | 53.69    | 7.5     | 0.0084   |
| AC             | 1       | 40.81    | 17.5    | 0.0001   |
| Be             | 1       | 16.62    | 4.28    | 0.0545   |
| Day 16         |         |          |         |          |
| Subplot        | 7       | 39.48    | 5.58    | 0.0002   |
| Linear Mixture | 2       | 41.65    | 1.2     | 0.3103   |
| AB             | 1       | 51.81    | 3.36    | 0.0724   |
| Ae             | 1       | 44.06    | 0.03    | 0.8632   |
| BC             | 1       | 39.95    | 17.06   | 0.0002   |
| Be             | 1       | 46.96    | 0.1142  | 0.7369   |
| ABe            | 1       | 51.74    | 1.04    | 0.3125   |
| Day 20         |         |          |         |          |
| Subplot        | 5       | 47.54    | 10.82   | < 0.0001 |
| Linear Mixture | 2       | 42.38    | 3.07    | 0.0566   |
| AB             | 1       | 52.24    | 4.07    | 0.0489   |
| BC             | 1       | 41.3     | 27.52   | < 0.0001 |
| Ce             | 1       | 38.16    | 3.3     | 0.0771   |
| Day 22         |         |          |         |          |
| Subplot        | 7       | 39.56    | 5.39    | 0.0002   |
| Linear Mixture | 2       | 39.61    | 14.02   | < 0.0001 |
| AB             | 1       | 51.99    | 3.25    | 0.077    |
| AC             | 1       | 39.49    | 17.18   | 0.0002   |
| Ad             | 1       | 46.81    | 0.0397  | 0.843    |
| Bd             | 1       | 48.78    | 0.1341  | 0.7158   |
| ABd            | 1       | 43.02    | 3.03    | 0.0888   |

Terms: A = GelMA, B = PBS, C = OMA

Figure S4. DNA and GAG/DNA for validation data to support moving forward with these groups

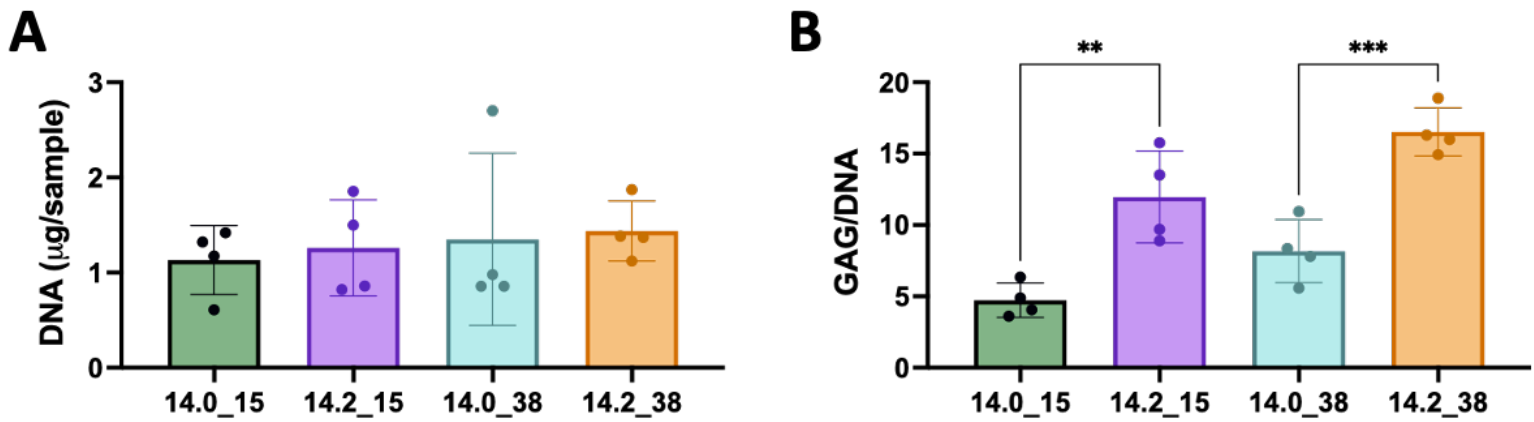

Figure S5: Chondrocyte viability in printed and pipetted hydrogels

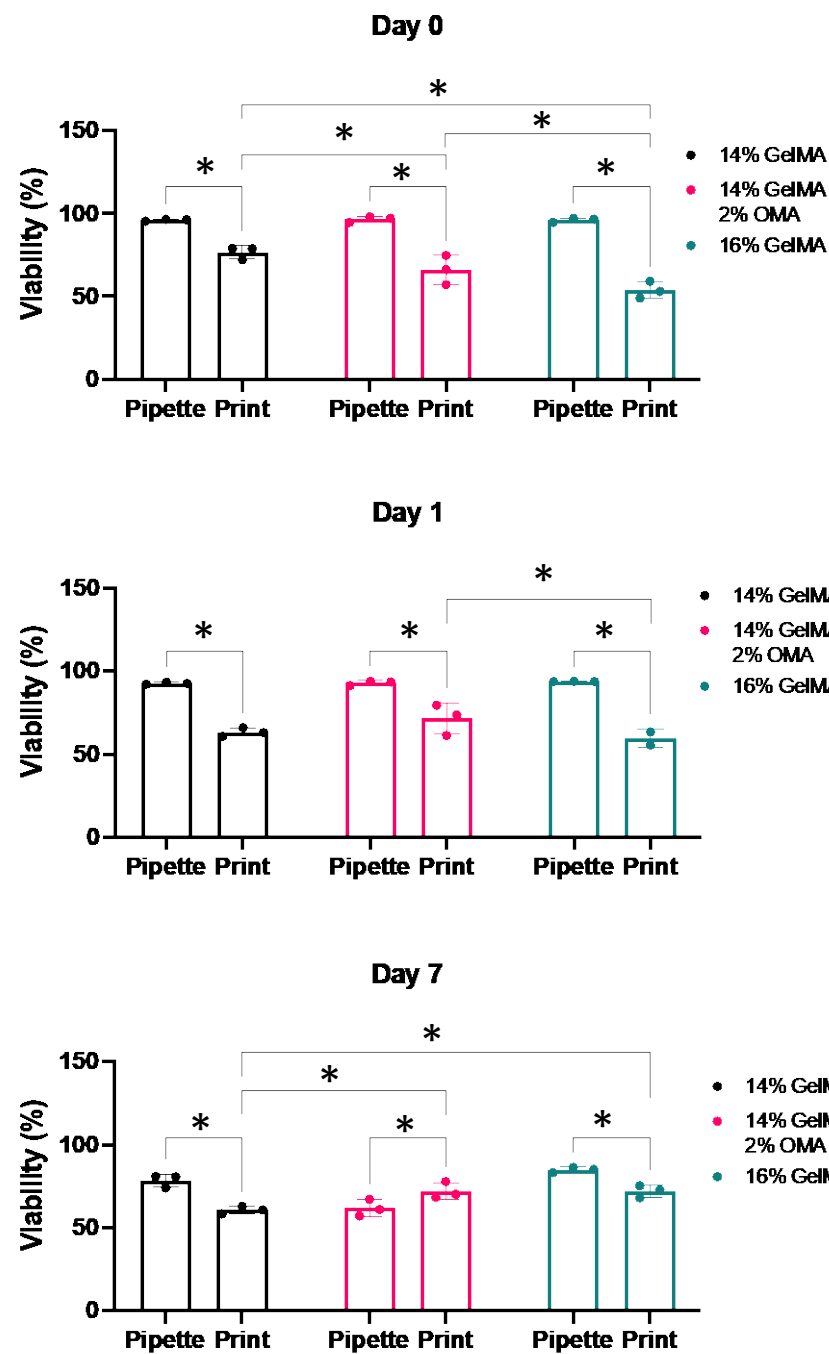

Figure S6: Cumulative lubricin driven luminescence vs. storage and loss moduli

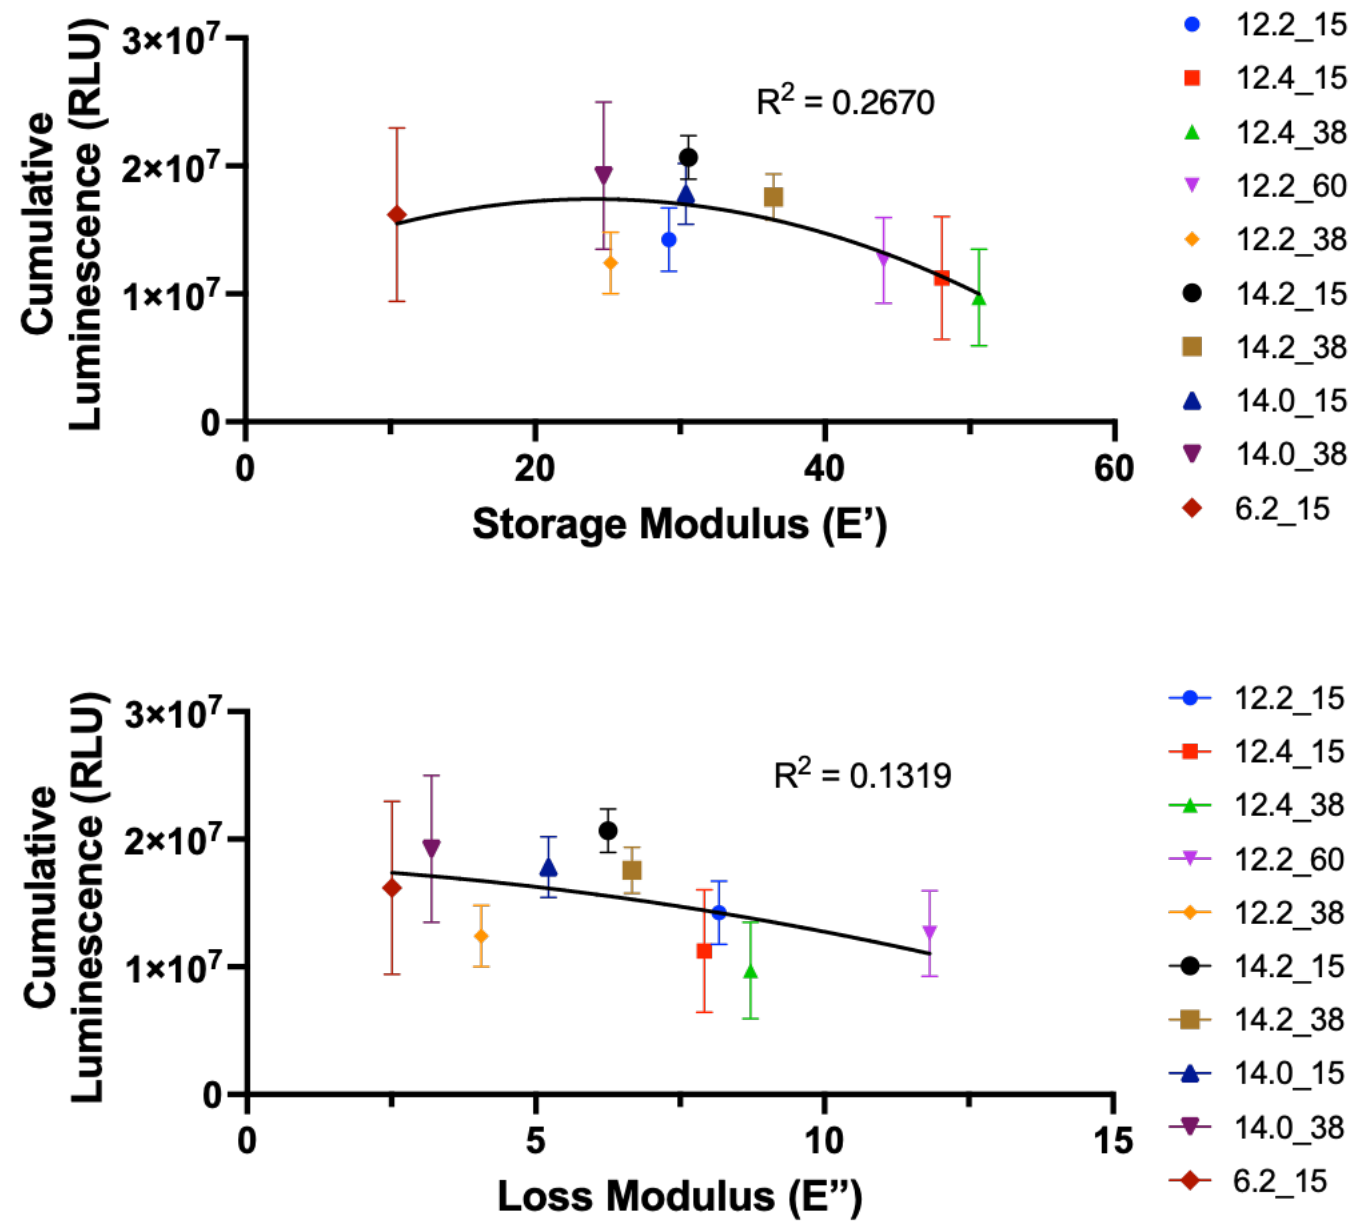

Figure S7: Loss Modulus, Tan Delta and Complex modulus at day 0 and 22

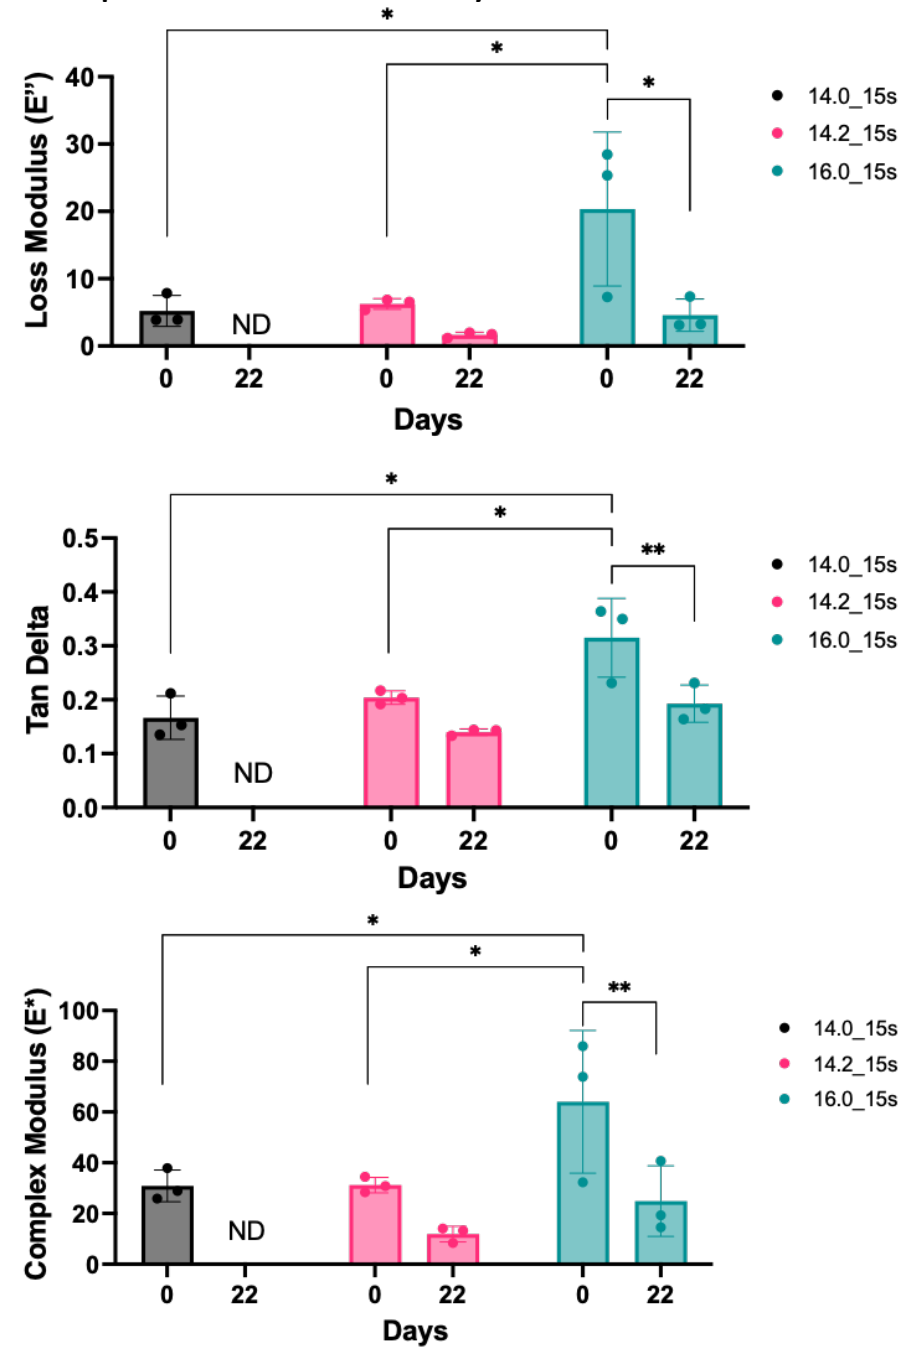

Supplement: s1 [file s1]
